# Supplementary material
Source: Springer Nature journal article supplement (https://www.springermedizin.de/resource/supplementary/13012_2013_764_MOESM2_ESM.pdf/9630640)
Supplement: MOESM2 [file 9630640]

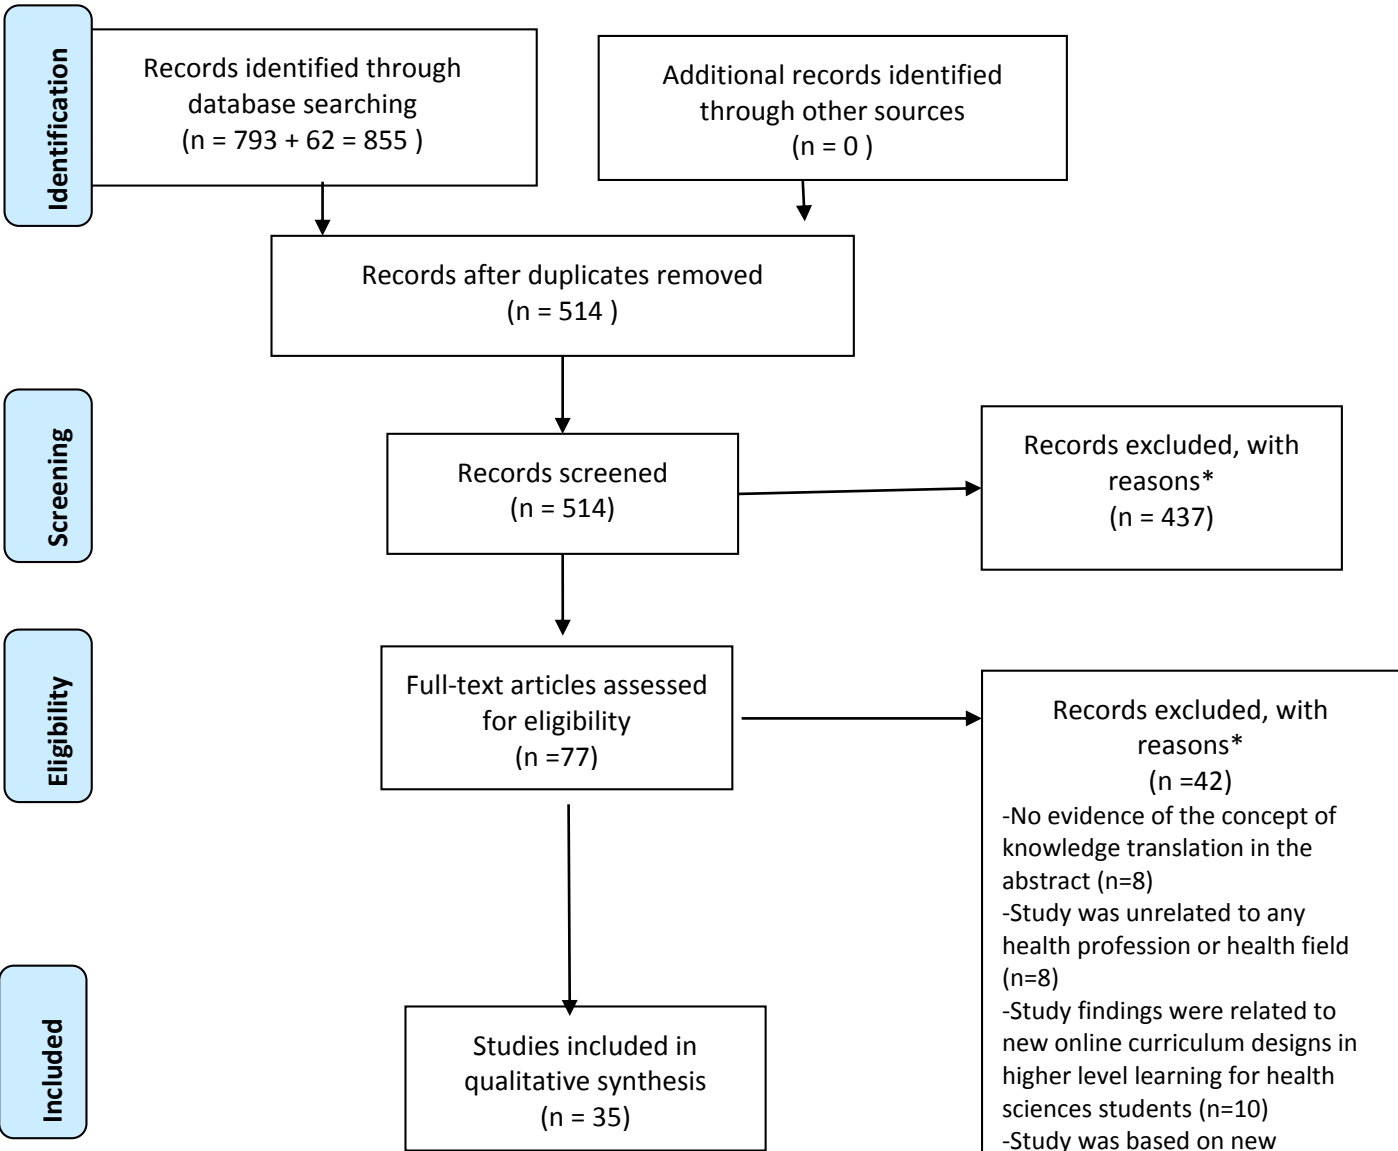

\*Reasons for excluding records or full-text articles are as follows:

- No evidence of the concept of knowledge translation in the abstract
- Study was unrelated to any health profession or health field
- Study findings were related to new online curriculum designs in higher level learning for health sciences students
- Study was based on new pedagogical methods (i.e. virtual, simulating techniques, etc.) for teaching in schools or was conducted in an educational setting with undergraduate students in health sciences

Records excluded, with reasons\*  
(n = 42)

- No evidence of the concept of knowledge translation in the abstract (n=8)
- Study was unrelated to any health profession or health field (n=8)
- Study findings were related to new online curriculum designs in higher level learning for health sciences students (n=10)
- Study was based on new pedagogical methods (i.e. virtual, simulating techniques, etc.) for teaching in schools or was conducted in an educational setting with undergraduate students in health sciences (n=16)
